# Supplementary material
Source: PubMed Central journal article supplement (PMC9463089)

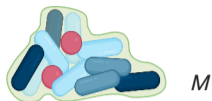

- Early-life URT and gut microbiome
- Early-life URT immune response

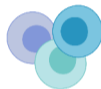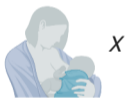

Exclusive  
breastfeeding

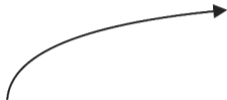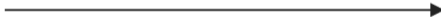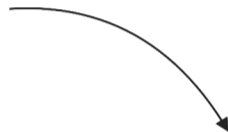

Y

- LRTI in infancy
- One-year food sensitization
- Four-year current asthma
- Four-year ever AR

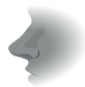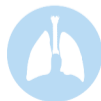

Supplement: NIHMS1787849-supplement-3.pdf [file NIHMS1787849-supplement-3.pdf]
